# Supplementary material for: Food Restriction in Mice Induces Food-Anticipatory Activity and Circadian-Rhythm-Related Activity Changes
Source: MDPI journal article supplement (doi:10.3390/nu14245252), 2022-12-09
Supplement: s1 [file s1]

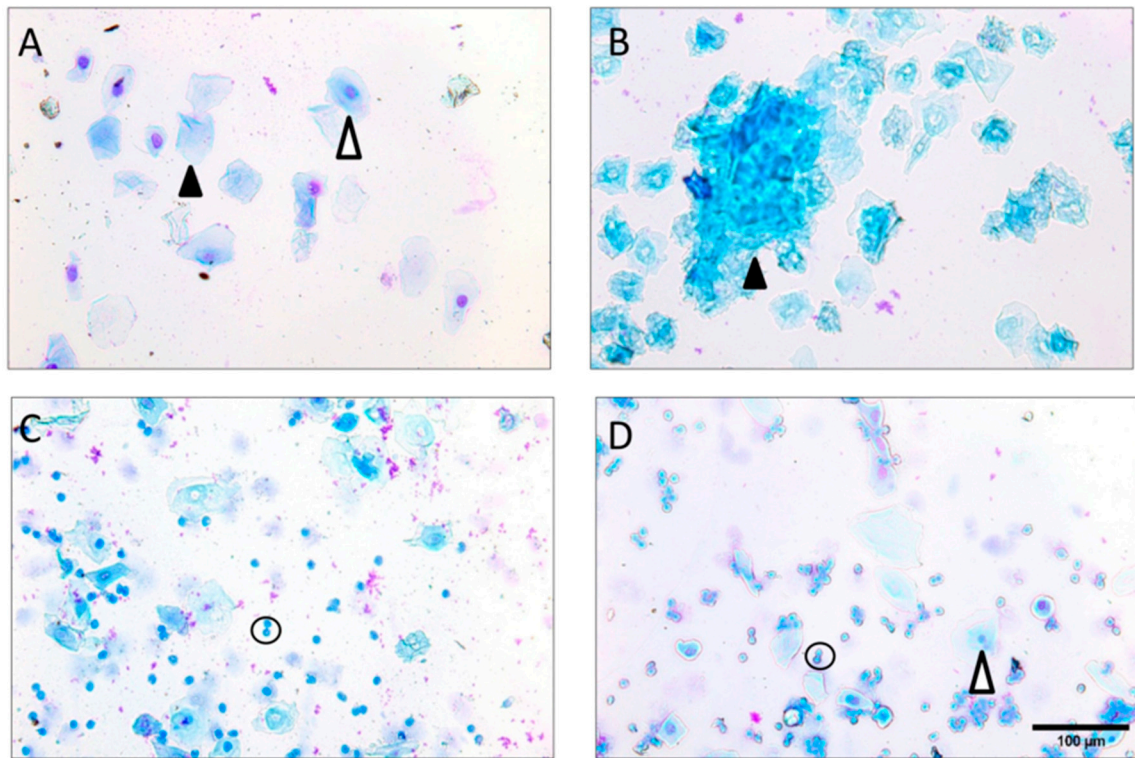

**Figure S1.** Histological determination of four stages of estrous in Giemsa-stained vaginal smears of C57BL/6J mice. Three cell types are identified: leukocytes (circle), cornified epithelial (black arrow), and nucleated epithelial (white arrow). Stages of estrous include (A) proestrous, (B) estrous, (C) metestrous, and (D) diestrous.
